# Supplementary material for: Phylogeographical structure and demographic expansion in the endemic alpine stream salamander (Hynobiidae: Batrachuperus) of the Qinling Mountains
Source: PubMed Central journal article supplement (PMC5431969; doi:10.1038/s41598-017-01799-w), 2017-05-12
Supplement: 41598_2017_1799_MOESM1_ESM.pdf [file 41598_2017_1799_MOESM1_ESM.pdf]

**Supplementary Table S2** X/Y coordinates of presences of *B. tibetanus* in China used for ecological niche

modelling (ENM).

| x      | y       |
|--------|---------|
| 35.706 | 102.760 |
| 35.683 | 102.779 |
| 35.754 | 102.787 |
| 34.106 | 107.218 |
| 33.780 | 105.493 |
| 33.904 | 105.464 |
| 34.659 | 104.139 |
| 34.690 | 104.129 |
| 35.117 | 103.983 |
| 35.470 | 102.906 |
| 34.533 | 103.486 |
| 33.617 | 104.183 |
| 32.967 | 104.122 |
| 33.349 | 104.001 |
| 33.370 | 104.061 |
| 32.917 | 104.333 |
| 32.892 | 104.387 |
| 32.583 | 104.750 |
| 33.633 | 104.250 |
| 33.602 | 104.485 |
| 33.550 | 104.183 |
| 32.920 | 103.442 |
| 33.061 | 103.722 |
| 32.743 | 103.681 |
| 33.416 | 103.390 |
| 31.690 | 102.780 |
| 31.501 | 102.469 |
| 31.666 | 102.321 |

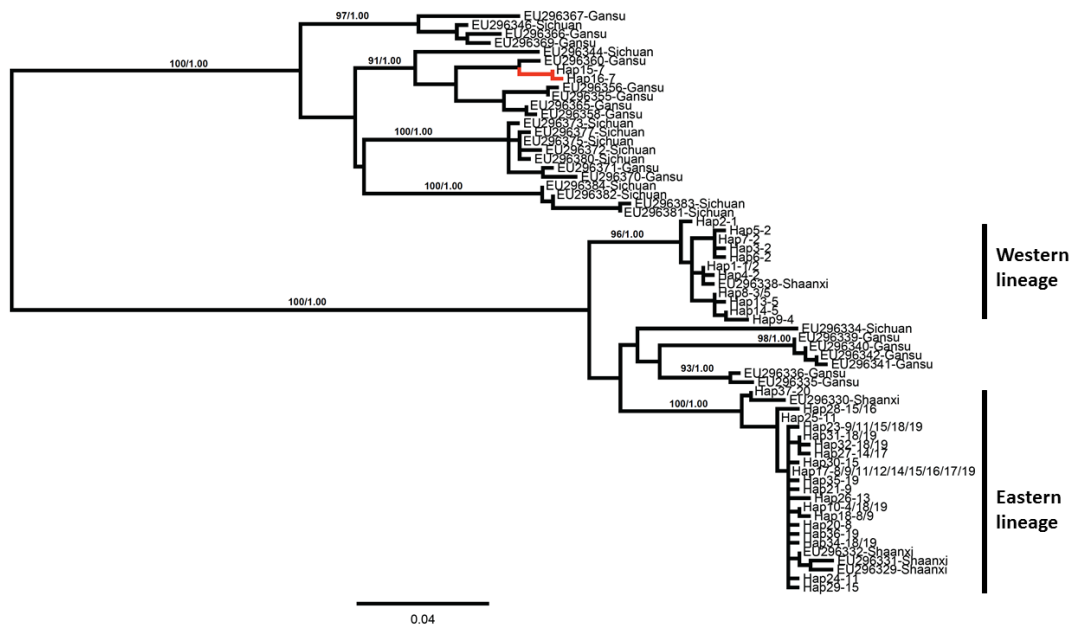

**Supplementary Fig. S1** Maximum likelihood tree derived from cytochrome *b* partial sequences of *B. tibetanus*.

The sequences labelled with Genbank accession numbers and geographic sources are previously published in Fu & Zeng (2008)<sup>25</sup>. The haplotypes used in our study are named by numbers (1-37). Haplotype shared by multiple locations are labelled by all location numbers separated by ‘/’. Haplotype and location numbers are separated by ‘-’. The two haplotypes (Hap15 and Hap16) from QLC population are the Tibetan lineage of *B. tibetanus* distributed in the Qinling Mountains. The haplotypes grouped with the eastern and western Qinling lineages are distributed in the Gansu and Sichuan provinces. These lineages except for the Tibetan lineage are previously described as *B. taibaiensis*<sup>35</sup>. Numbers next to nodes indicate bootstrap values and Bayesian posterior probabilities.

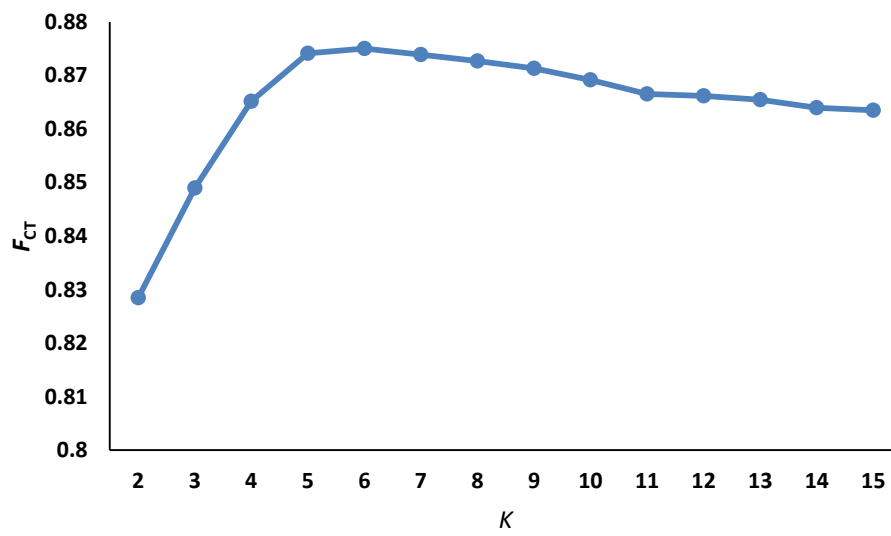

**Supplementary Fig. S2** Fixation index ( $F_{CT}$ ) as a function of the user-defined number of groups of populations ( $K$ ) for 20 of *B. tibetanus* in the Qinling Mountains using SAMOVA.

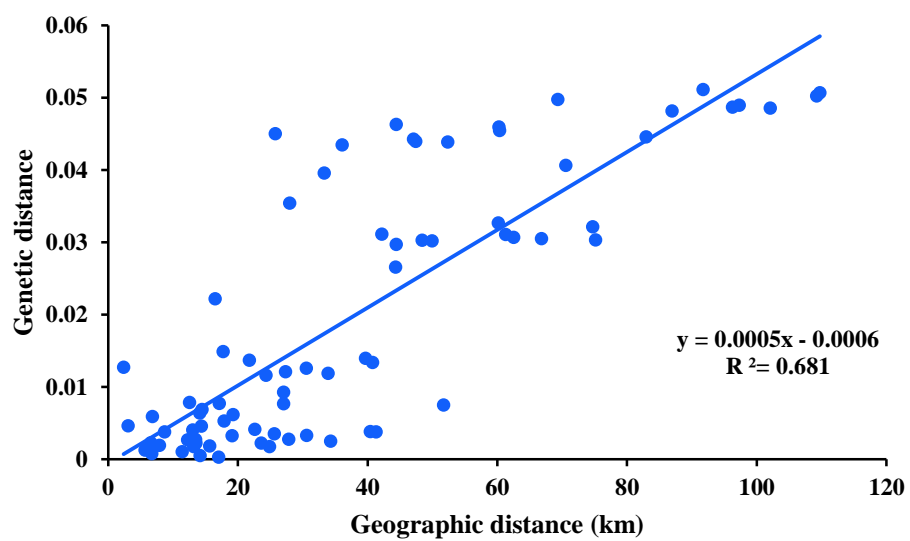

**Supplementary Fig. S3** Results of Mantel tests show significant correlation between genetic distance and geographical distance ( $r^2=0.681$ ,  $P < 0.001$ ), corresponding with the hypothesis of isolation-by-distance model (IBD) (13 populations with no less than 10 samples were involved).

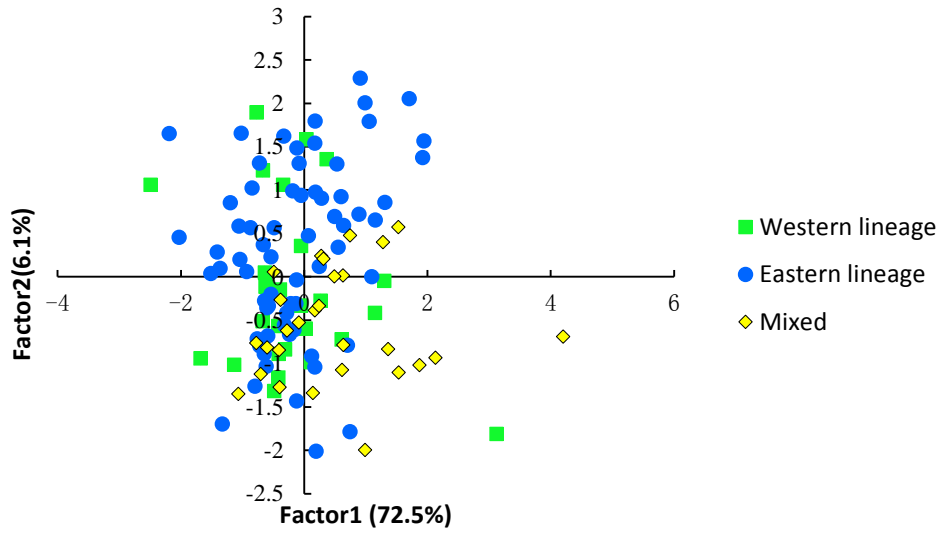

**Supplementary Fig. S4** Factor analysis based on morphological data. The individuals from the western and eastern lineages are labelled by square and circle, respectively. The individuals from four mixed populations (i.e. DP, HSP, ZH and NSG) possessing the haplotypes from the two *Cytb* lineages are labelled by diamonds.
